# Supplementary material for: Deep Learning-Based Artificial Intelligence System for Automatic Assessment of Glomerular Pathological Findings in Lupus Nephritis
Source: MDPI journal article supplement (doi:10.3390/diagnostics11111983), 2021-10-26
Supplement: s1 [file s1]

## Supplementary Materials

**Table S1:** Clinicopathological features of lupus nephritis patients at time of biopsy.

| Variables                                    | Patients (n=163)   |
|----------------------------------------------|--------------------|
| Female, n (%)                                | 143 (89.38%)       |
| Age, years (median, IQR)                     | 30 (24–39)         |
| Disease duration, years (median, IQR)        | 3.3 (0.6–7.0)      |
| Age at diagnosis, years (median, IQR)        | 27 (21–33)         |
| LN classification (ground truth), n (%)      |                    |
| II                                           | 50 (30.67%)        |
| III                                          | 51 (31.29%)        |
| IV                                           | 62 (38.04%)        |
| Clinical features, n (%)                     |                    |
| Rash                                         | 135 (82.82%)       |
| Photosensitivity                             | 29 (17.79%)        |
| Alopecia                                     | 74 (45.40%)        |
| Oral ulcerations                             | 28 (82.82%)        |
| Fever                                        | 75 (17.18%)        |
| Fatigue                                      | 49 (30.06%)        |
| Arthritis                                    | 97 (59.51%)        |
| Vasculitis                                   | 41 (25.15%)        |
| Leucopenia                                   | 22 (13.50%)        |
| Thrombocytopenia                             | 18 (11.04%)        |
| Hypertension                                 | 22 (13.50%)        |
| Renal dysfunction (>133 $\mu\text{mol/L}$ )  | 17 (10.43%)        |
| Proteinuria, g/24 hours (median, IQR)        | 0.65 (0.16–2.26)   |
| Serum creatinine, $\mu\text{mol/L}$          | 87.40 $\pm$ 30.54  |
| eGFR mL/ (min $\times$ 1.73 m <sup>2</sup> ) | 120.43 $\pm$ 37.47 |
| Serum albumin, g/dL                          | 32.87 $\pm$ 7.69   |
| C3, mg/dL                                    | 50.81 $\pm$ 26.30  |
| C4, mg/dL                                    | 9.59 $\pm$ 6.65    |
| Anti-dsDNA, positive N (%)                   | 95 (58.28%)        |

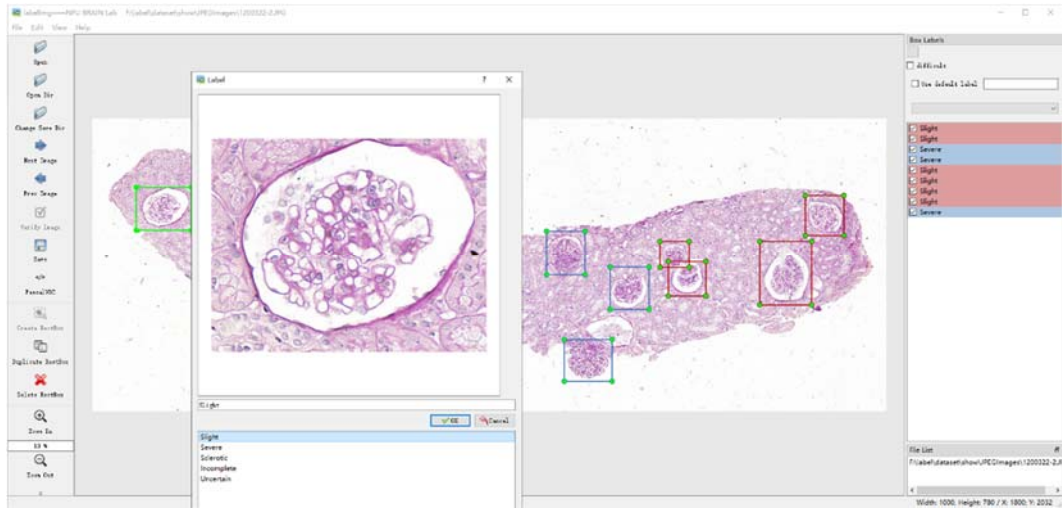

**Figure S1:** Screenshot of our annotation tool, the modified LabelImg.

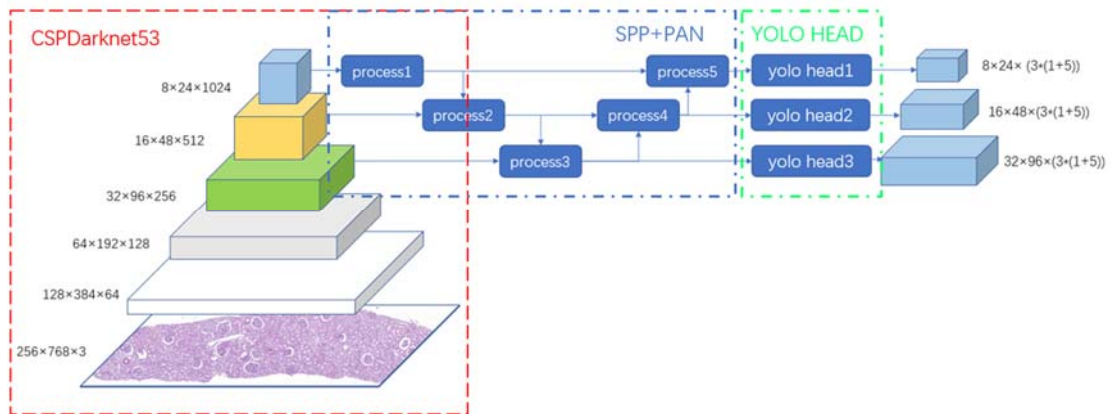

**Figure S2:** Network architecture of yolov4. Processes 1–5 contain operations such as convolution, upsampling, and downsampling. The SPP block is in process 1.

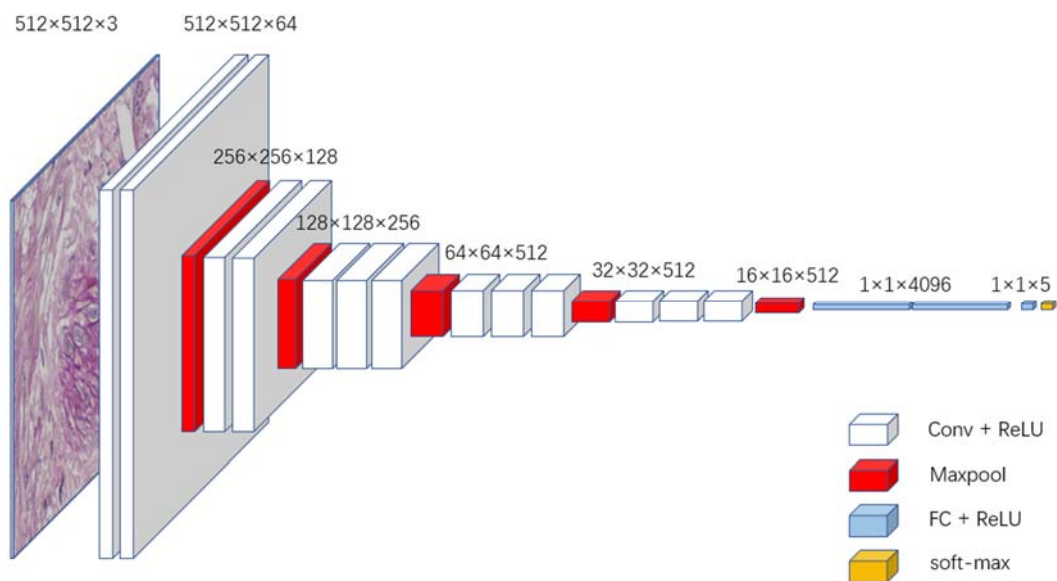

**Figure S3:** Network architecture of VGG16.
